# Supplementary material
Source: Springer Nature journal article supplement (https://www.springermedizin.de/resource/supplementary/12911_2012_547_MOESM1_ESM.pdf/9526116)
Supplement: MOESM1 [file 9526116]

**PART I: General appreciation**

1. How did you like this Decision Box?

|                                                                                   |                                                                                   |                                                                                   |                                                                                   |                                                                                   |
|-----------------------------------------------------------------------------------|-----------------------------------------------------------------------------------|-----------------------------------------------------------------------------------|-----------------------------------------------------------------------------------|-----------------------------------------------------------------------------------|
|  |  |  |  |  |
| <input type="radio"/>                                                             | <input type="radio"/>                                                             | <input type="radio"/>                                                             | <input type="radio"/>                                                             | <input type="radio"/>                                                             |

**PART II: Questionnaire based on the Theory of planned behaviour**

Now, **thinking of your next patient to who this intervention might apply**, please read the following comments and check the answer of your choice.

2. I intend to use what I learned from this document to precisely explain to this patient the advantages and disadvantages of the options.

|                       |                       |                       |                       |                       |                       |                       |
|-----------------------|-----------------------|-----------------------|-----------------------|-----------------------|-----------------------|-----------------------|
| <input type="radio"/> | <input type="radio"/> | <input type="radio"/> | <input type="radio"/> | <input type="radio"/> | <input type="radio"/> | <input type="radio"/> |
| -3                    | -2                    | -1                    | 0                     | +1                    | +2                    | +3                    |
| Strongly disagree     |                       |                       |                       | Strongly agree        |                       |                       |

3. Most of my patients would approve of my using what I learned from this document to precisely explain to this patient the advantages and disadvantages of the options.

|                           |                       |                       |                       |                        |                       |                       |
|---------------------------|-----------------------|-----------------------|-----------------------|------------------------|-----------------------|-----------------------|
| <input type="radio"/>     | <input type="radio"/> | <input type="radio"/> | <input type="radio"/> | <input type="radio"/>  | <input type="radio"/> | <input type="radio"/> |
| -3                        | -2                    | -1                    | 0                     | +1                     | +2                    | +3                    |
| Would strongly disapprove |                       |                       |                       | Would strongly approve |                       |                       |

It seems to me that using what I learned from this document to precisely explain the advantages and disadvantages of the options to my next patient who considers this intervention is...

4.

|                       |                       |                       |                       |                       |                       |                       |
|-----------------------|-----------------------|-----------------------|-----------------------|-----------------------|-----------------------|-----------------------|
| <input type="radio"/> | <input type="radio"/> | <input type="radio"/> | <input type="radio"/> | <input type="radio"/> | <input type="radio"/> | <input type="radio"/> |
| -3                    | -2                    | -1                    | 0                     | +1                    | +2                    | +3                    |
| Very useless          |                       |                       |                       | Very useful           |                       |                       |

5.

|                       |                       |                       |                       |                       |                       |                       |
|-----------------------|-----------------------|-----------------------|-----------------------|-----------------------|-----------------------|-----------------------|
| <input type="radio"/> | <input type="radio"/> | <input type="radio"/> | <input type="radio"/> | <input type="radio"/> | <input type="radio"/> | <input type="radio"/> |
| -3                    | -2                    | -1                    | 0                     | +1                    | +2                    | +3                    |
| Very difficult        |                       |                       |                       | Very easy             |                       |                       |

6.

|                       |                       |                       |                       |                       |                       |                       |
|-----------------------|-----------------------|-----------------------|-----------------------|-----------------------|-----------------------|-----------------------|
| <input type="radio"/> | <input type="radio"/> | <input type="radio"/> | <input type="radio"/> | <input type="radio"/> | <input type="radio"/> | <input type="radio"/> |
| -3                    | -2                    | -1                    | 0                     | +1                    | +2                    | +3                    |
| Very irresponsible    |                       |                       |                       | Very responsible      |                       |                       |

7.

|                       |                       |                       |                       |                       |                       |                       |
|-----------------------|-----------------------|-----------------------|-----------------------|-----------------------|-----------------------|-----------------------|
| <input type="radio"/> | <input type="radio"/> | <input type="radio"/> | <input type="radio"/> | <input type="radio"/> | <input type="radio"/> | <input type="radio"/> |
| -3                    | -2                    | -1                    | 0                     | +1                    | +2                    | +3                    |
| Very unlikely         |                       |                       |                       | Very likely           |                       |                       |

8.

|                       |                       |                       |                       |                       |                       |                       |
|-----------------------|-----------------------|-----------------------|-----------------------|-----------------------|-----------------------|-----------------------|
| <input type="radio"/> | <input type="radio"/> | <input type="radio"/> | <input type="radio"/> | <input type="radio"/> | <input type="radio"/> | <input type="radio"/> |
| -3                    | -2                    | -1                    | 0                     | +1                    | +2                    | +3                    |
| Very harmful          |                       |                       |                       | Very beneficial       |                       |                       |

9. My close colleagues would approve of my using what I learned from this document to precisely explain to this patient the advantages and disadvantages of the options.

|                       |                       |                       |                       |                       |                       |                       |
|-----------------------|-----------------------|-----------------------|-----------------------|-----------------------|-----------------------|-----------------------|
| <input type="radio"/> | <input type="radio"/> | <input type="radio"/> | <input type="radio"/> | <input type="radio"/> | <input type="radio"/> | <input type="radio"/> |
| -3                    | -2                    | -1                    | 0                     | +1                    | +2                    | +3                    |
| Strongly disagree     |                       |                       |                       | Strongly agree        |                       |                       |

10. I feel able to use what I learned from this document to precisely explain to this patient the advantages and disadvantages of the options.

|                       |                       |                       |                       |                       |                       |                       |
|-----------------------|-----------------------|-----------------------|-----------------------|-----------------------|-----------------------|-----------------------|
| <input type="radio"/> | <input type="radio"/> | <input type="radio"/> | <input type="radio"/> | <input type="radio"/> | <input type="radio"/> | <input type="radio"/> |
| -3                    | -2                    | -1                    | 0                     | +1                    | +2                    | +3                    |
| Strongly disagree     |                       |                       |                       | Strongly agree        |                       |                       |

11. I will use what I learned from this document to precisely explain to this patient the advantages and disadvantages of the options.

|                       |                       |                       |                       |                       |                       |                       |
|-----------------------|-----------------------|-----------------------|-----------------------|-----------------------|-----------------------|-----------------------|
| <input type="radio"/> | <input type="radio"/> | <input type="radio"/> | <input type="radio"/> | <input type="radio"/> | <input type="radio"/> | <input type="radio"/> |
| -3                    | -2                    | -1                    | 0                     | +1                    | +2                    | +3                    |
| Very unlikely         |                       |                       |                       | Very likely           |                       |                       |

12. I see many reasons to use what I learned from this document to precisely explain to my next patient the advantages and disadvantages of the options.

|                       |                       |                       |                       |                       |                       |                       |
|-----------------------|-----------------------|-----------------------|-----------------------|-----------------------|-----------------------|-----------------------|
| <input type="radio"/> | <input type="radio"/> | <input type="radio"/> | <input type="radio"/> | <input type="radio"/> | <input type="radio"/> | <input type="radio"/> |
| -3                    | -2                    | -1                    | 0                     | +1                    | +2                    | +3                    |
| Strongly disagree     |                       |                       |                       | Strongly agree        |                       |                       |

13. Most people in my professional surroundings would urge me to use what I learned from this document to precisely explain to this patient the advantages and disadvantages of the options.

|                       |                       |                       |                       |                       |                       |                       |
|-----------------------|-----------------------|-----------------------|-----------------------|-----------------------|-----------------------|-----------------------|
| <input type="radio"/> | <input type="radio"/> | <input type="radio"/> | <input type="radio"/> | <input type="radio"/> | <input type="radio"/> | <input type="radio"/> |
| -3                    | -2                    | -1                    | 0                     | +1                    | +2                    | +3                    |
| Strongly disagree     |                       |                       |                       | Strongly agree        |                       |                       |

## PART III : Information Assessment Method (IAM)

### SECTION #1 – COGNITIVE IMPACTS of the information

#### 14. What is the impact of this information on you or your practice? *Please check all that apply*

Note: You can check more than one type of impact<sup>1</sup>

My practice is (will be) changed and improved ☐

*If Yes, what aspect is (will be) changed or improved?*

- *Diagnostic approach?* ☐
- *Therapeutic approach?* ☐
- *Disease prevention or health education?* ☐
- *Counseling approach?* ☐

I learned something new ☐

I am motivated to learn more ☐

This information confirmed I did (am doing) the right thing ☐

I am reassured ☐

I am reminded of something I already knew ☐

I am dissatisfied ☐

There is a problem with the presentation of this information ☐

*If Yes, what problem do you see?*

- *Too much information?* ☐
- *Not enough information?* ☐
- *Information poorly written?* ☐
- *Too technical?* ☐
- *Other?* ☐

*If yes, please describe this problem.*

*Open text field*

I disagree with the content of this information ☐

This information is potentially harmful. ☐

*If yes, please describe how this information may be harmful*

*Open text field*

<sup>1</sup> Note to programmer: MUST check at least one

**Section #2 - RELEVANCE of the information****15. Is this information relevant for at least one of your patients?<sup>2</sup>**

- ☐ Totally relevant
- ☐ Partially relevant
- ☒ Not relevant

**Section #3 - USE of the information****16. Will you use this information for a specific patient?<sup>3</sup>****Yes****No****Possibly**☐☒☐**If YES: Please check all that apply<sup>4</sup>**

Note: You can check more than one type of use.

- ☐ As a result of this information I will manage this patient differently
- ☐ I had several options for this patient, and I will use this information to justify a choice
- ☐ I did not know what to do, and I will use this information to manage this patient
- ☐ I thought I knew what to do, and I used this information to be more certain about the management of this patient
- ☐ I used this information to better understand a particular issue related to this patient
- ☐ I will use this information in a discussion with this patient, or with other health professionals about this patient
- ☐ I will use this information to persuade this patient, or to persuade other health professionals to make a change for this patient

<sup>2</sup> Note to programmer: Answering "No" will disable Question #16<sup>3</sup> Note to programmer: Answering "No" or "Possibly" will disable items of 'use' and question #17<sup>4</sup> Note to programmer: **MUST check at least one**

**Section #4 – EXPECTED BENEFITS of the information**

17. For this patient, do you expect any health benefits as a result of applying this information?<sup>5</sup>

Yes

No

☐☒

If YES: Check all that apply. You may check more than type of health benefit <sup>6</sup>

This information will allow the patient to make a decision that is in better agreement with his/her personal circumstances, values and preferences. ☐

This information will help reduce the patient's uncertainty about the best decision to make. ☐

This information will help to avoid unnecessary or inappropriate treatment, diagnostic procedures, preventative interventions or a referral, for this patient ☐

**Comment on this information or this questionnaire.**

Open text field

***Thank you for having completed this questionnaire***

---

<sup>5</sup> Answering "No" will disable items of 'health benefit'

<sup>6</sup> Note to programmer: **MUST check at least one**
